# Supplementary material
Source: PubMed Central journal article supplement (PMC2913405)
Supplement: NIHMS212252-supplement-Supplementary.pdf [file NIHMS212252-supplement-Supplementary.pdf]

## SUPPORTING MATERIAL INFORMATION

---

### **Conjugation of 2-(1'-Hexyloxyethyl)-2-Devinylpyropheophorbide-a (HPPH) to Carbohydrates Changes its Subcellular Distribution and Enhances Photodynamic Activity *in Vivo*<sup>†</sup>**

Xiang Zheng, Janet Morgan, Suresh K. Pandey, Yihui Chen Erin Tracy, Heinz Baumann,

Joseph R. Missert, Carrie Batt, Jennifer Jackson, David A. Bellnier,

Barbara W. Henderson, and Ravindra K. Pandey\*

---

#### **Contents:**

- S2-S20: <sup>1</sup>H NMR spectra of the intermediates and the final products  
S21: Figure 1: Effect of an inhibitor of ABCG2 (imatinib mesylate) on retention  
of HPPH and HPPH-carbohydrate conjugates in RIF cells.  
S22: Figure 2: Comparative effect of ABCG2 inhibitor (imatinib mesylate) on retention  
of HPPH or HPPH-Gal in RIF and Colon26 tumors.  
S23-29: Figure 3: Comparative intracellular localization of HPPH-carbohydrate  
conjugates.  
S30: Table 1: Intracellular localization of HPPH and its carbohydrate conjugates.  
S31: Table 2: HPLC analysis of the final products

# Compound 1c

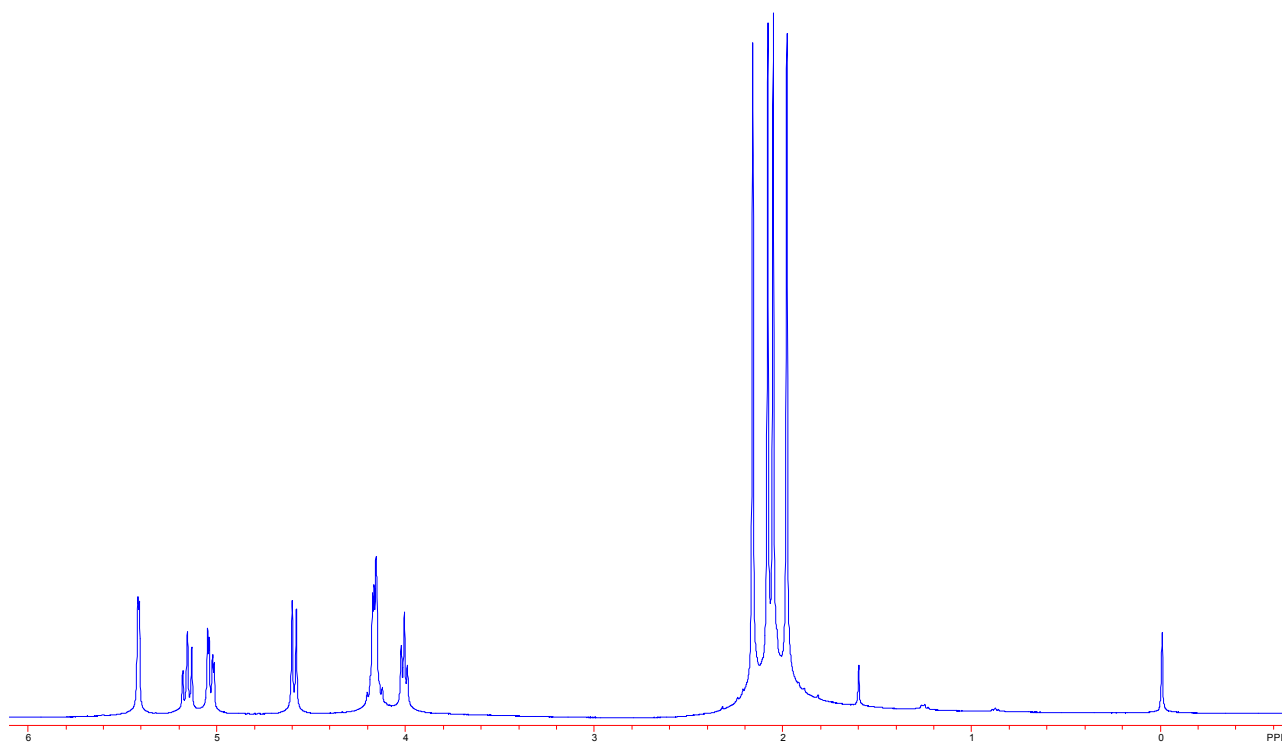

## Compound 2b

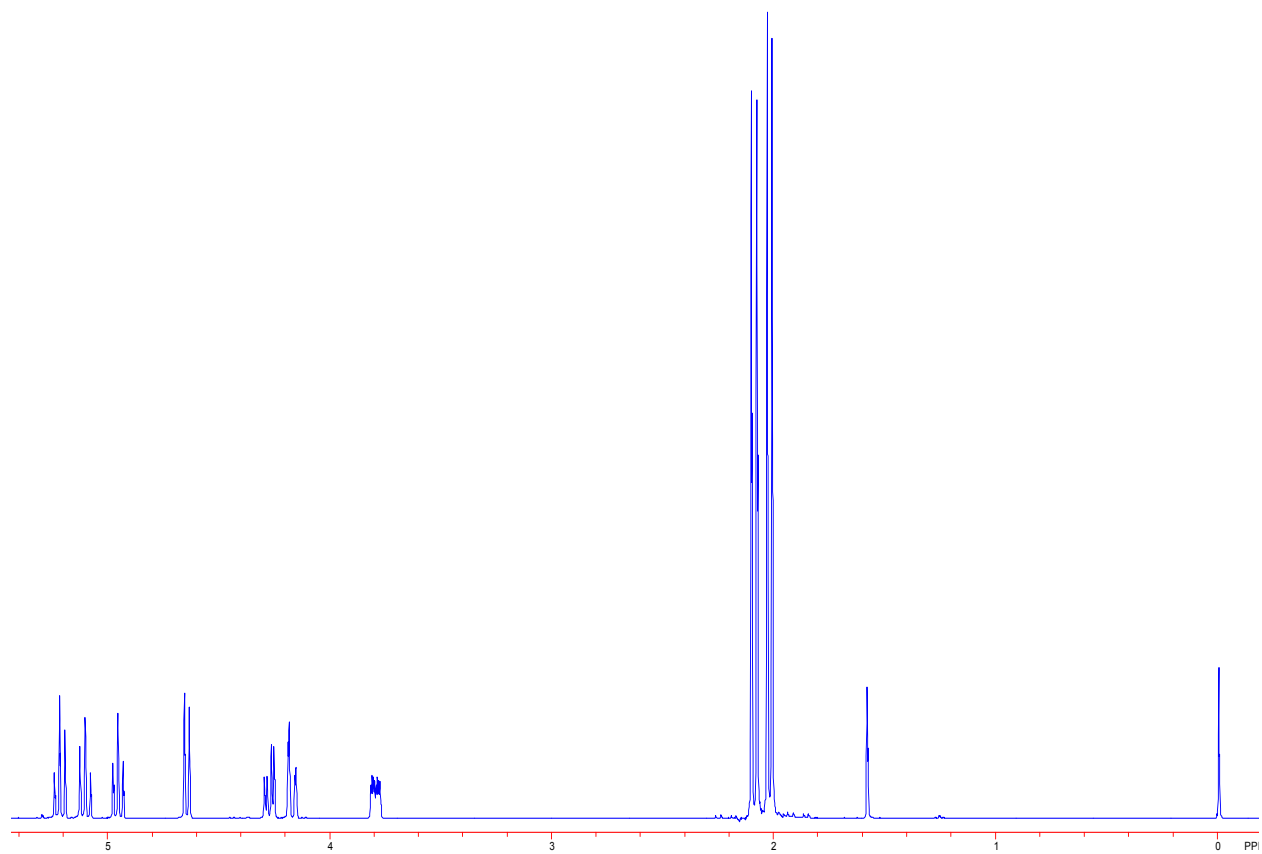

## Compound 2

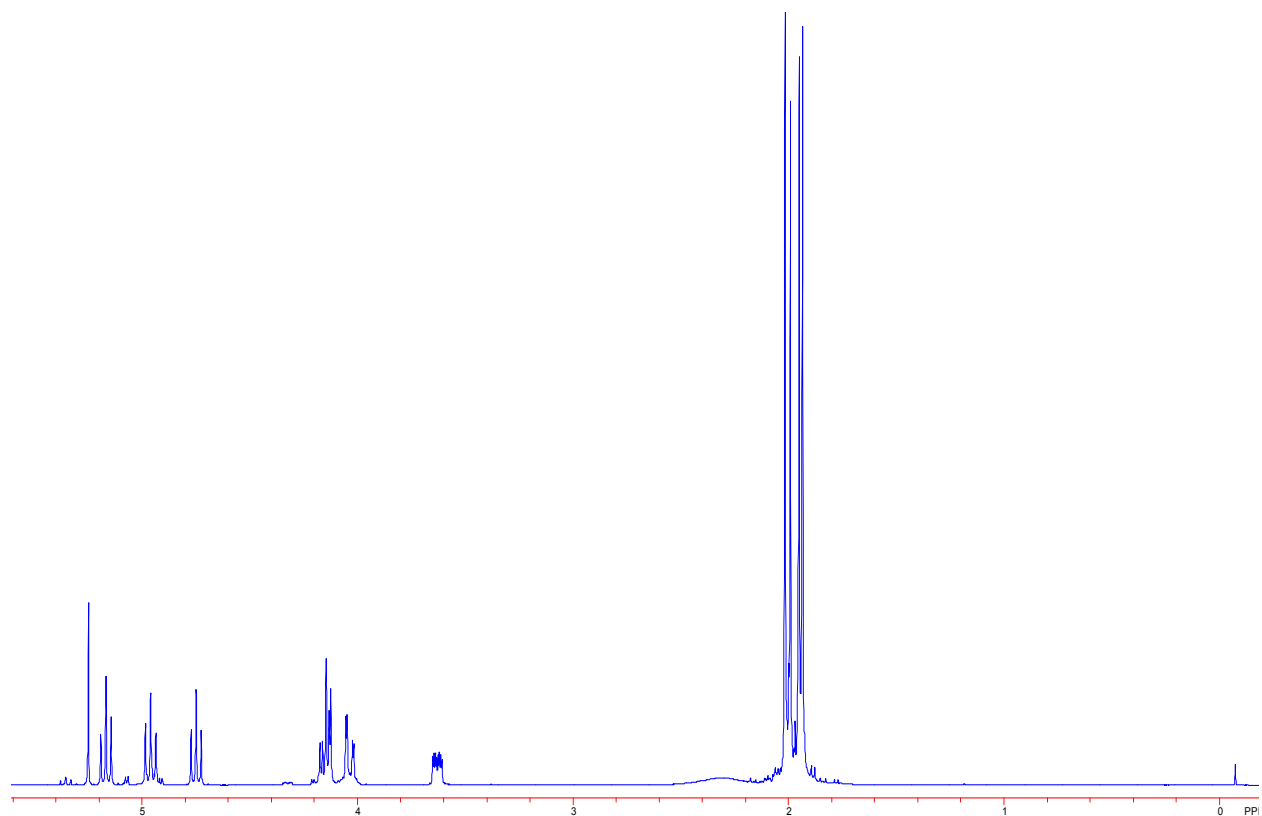

# Compound 3c

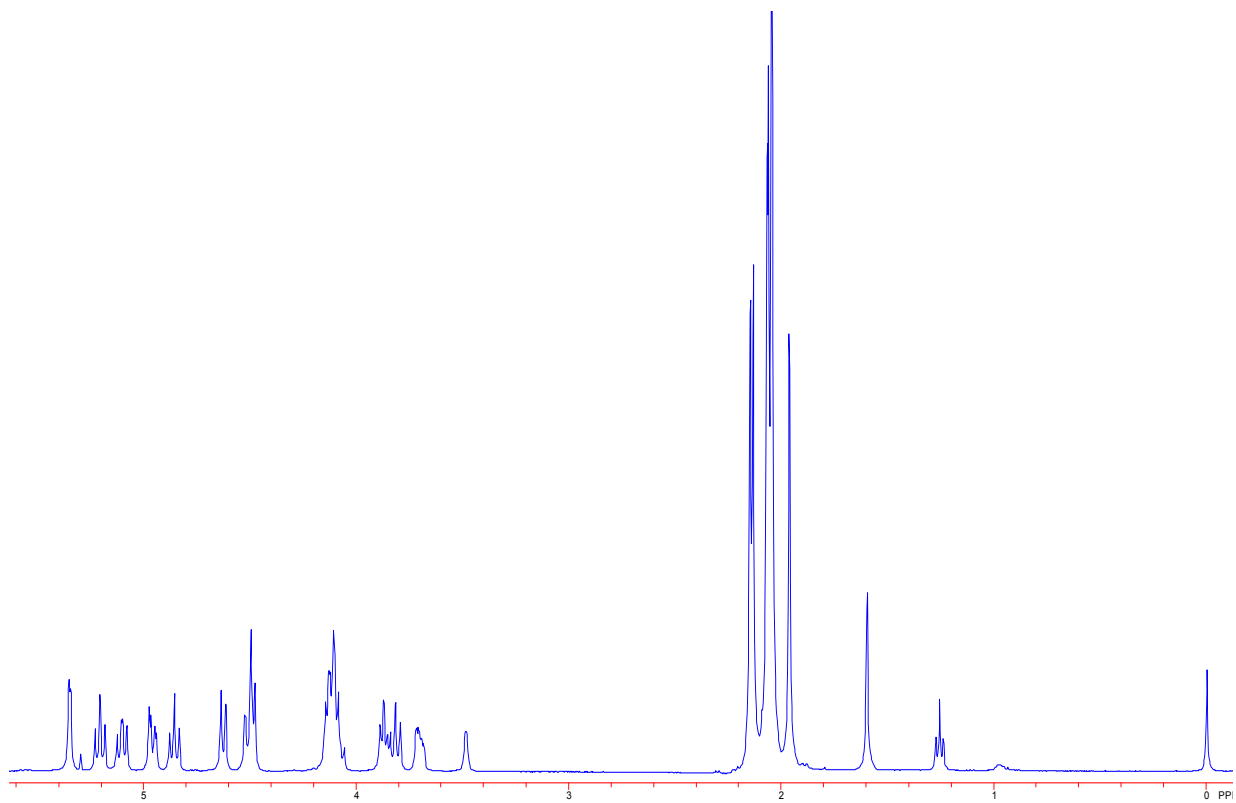

# Compound 4c

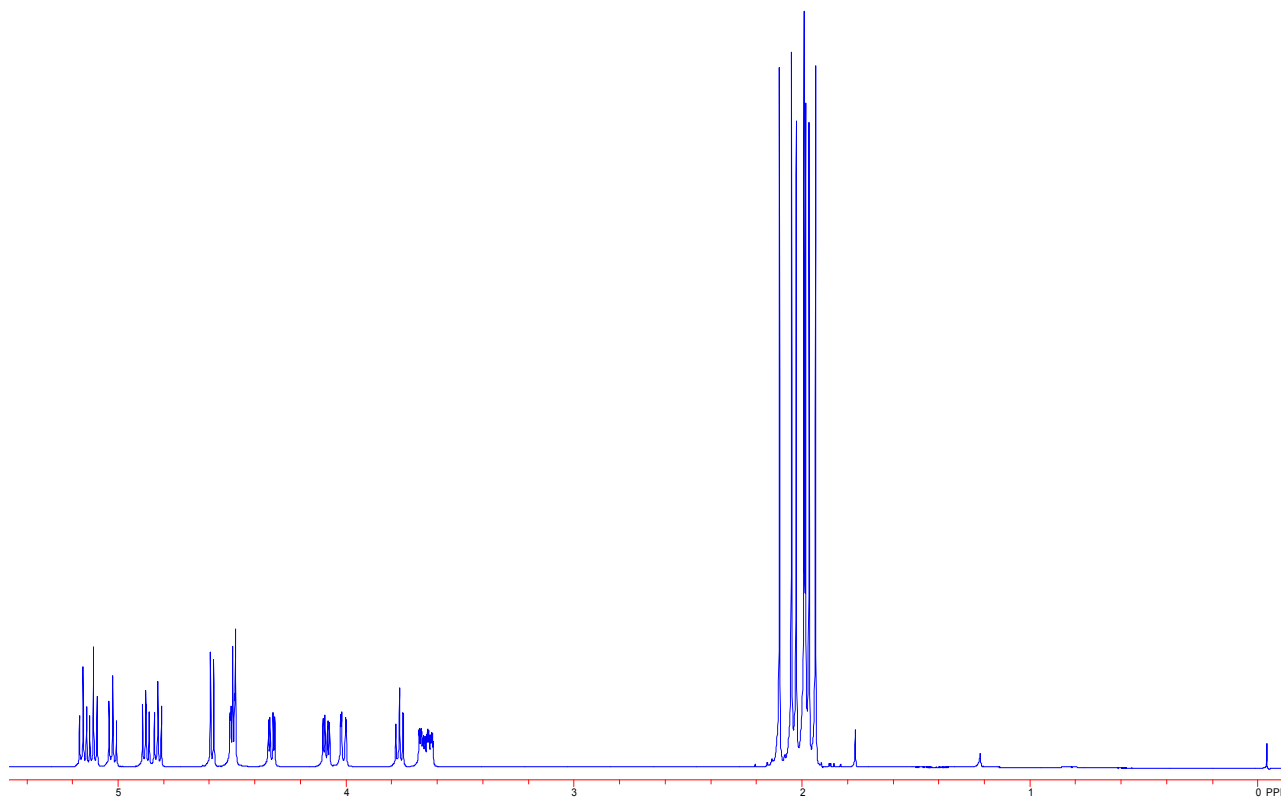

# Compound 4

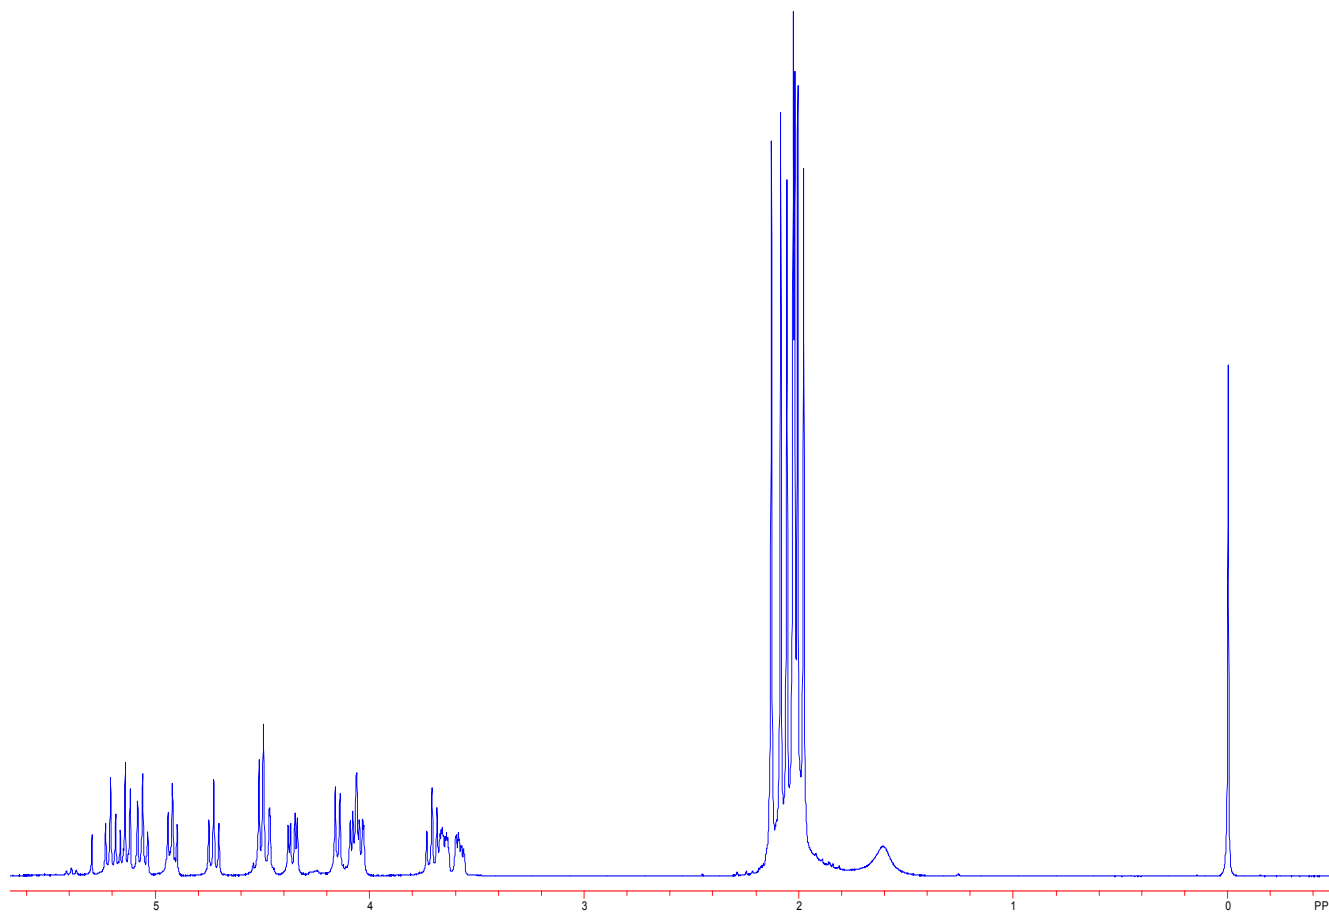

# Compound 5

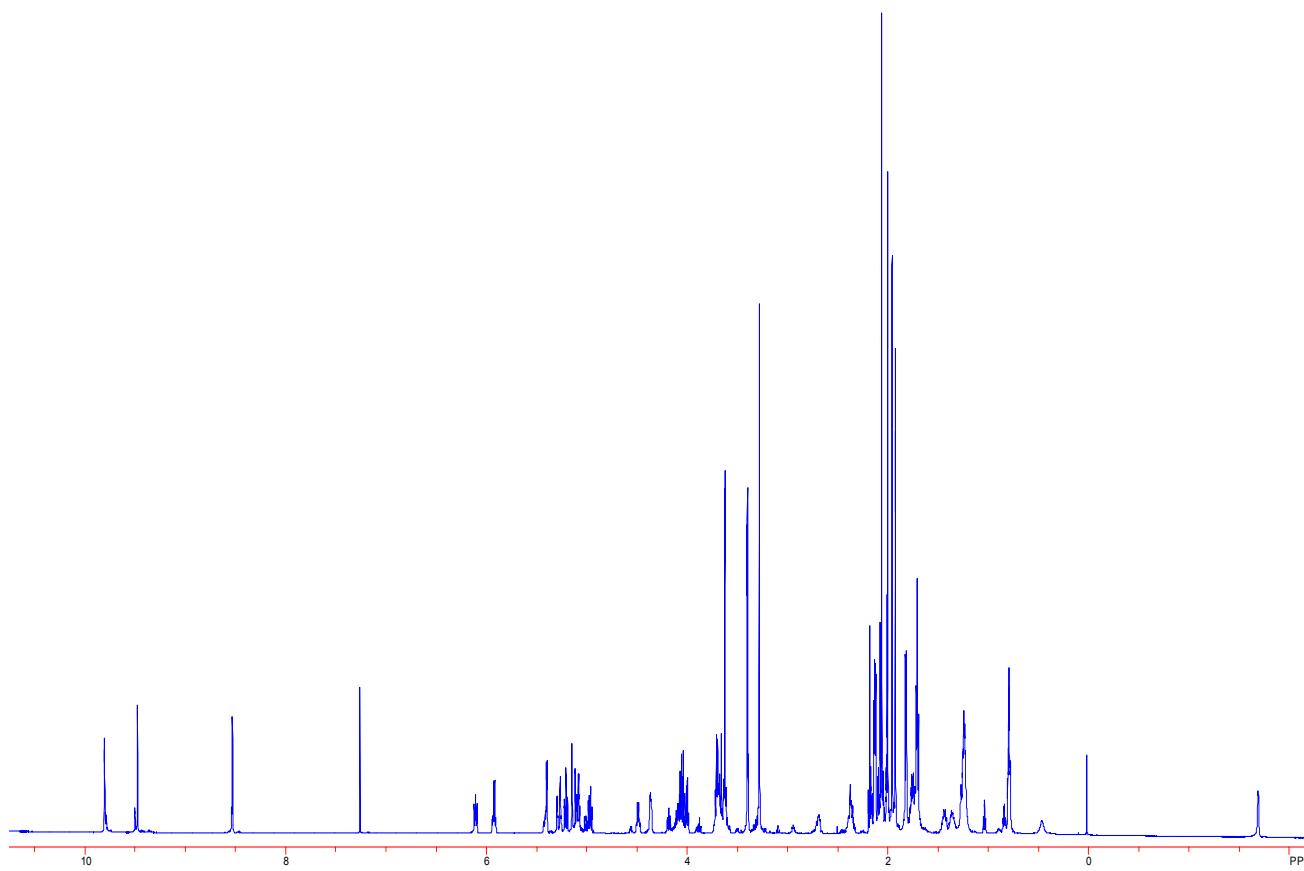



# Compound 6

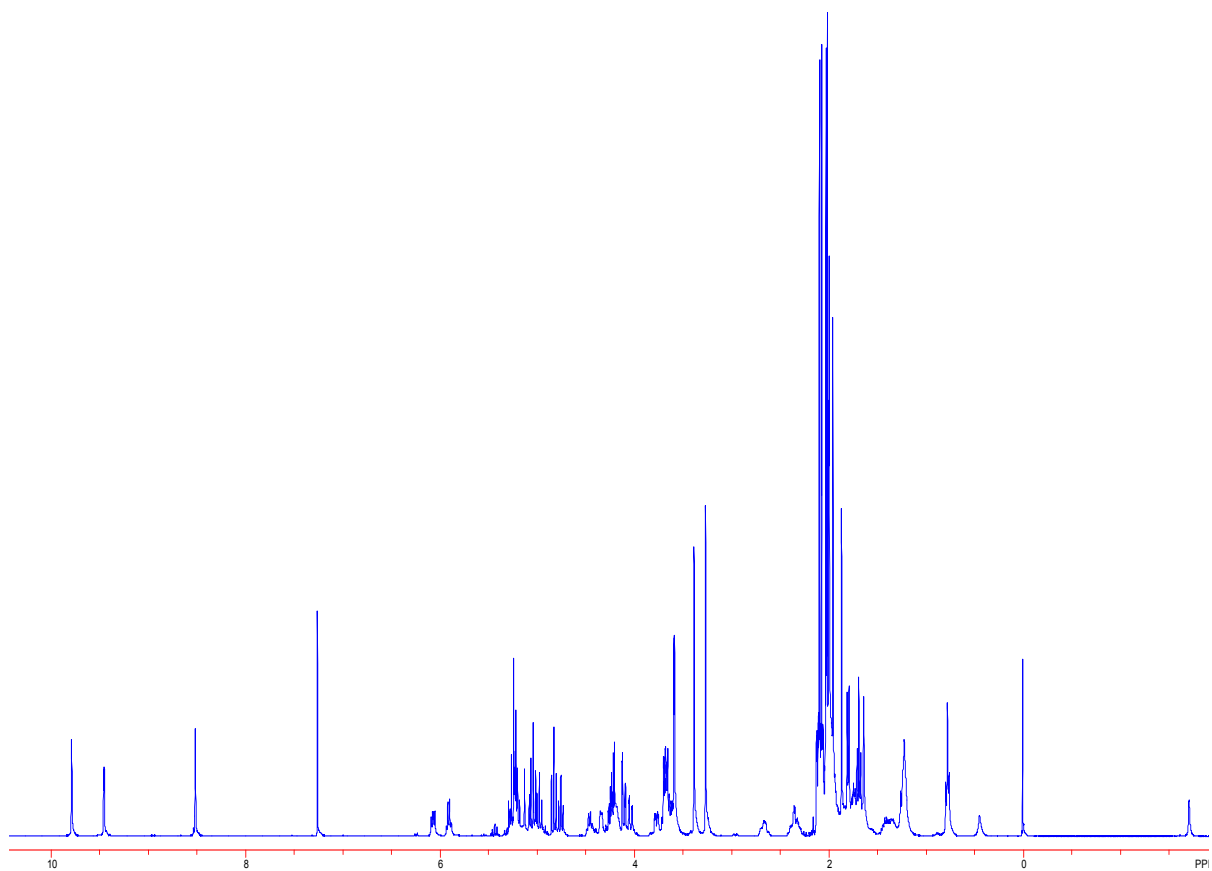

# Compound 7

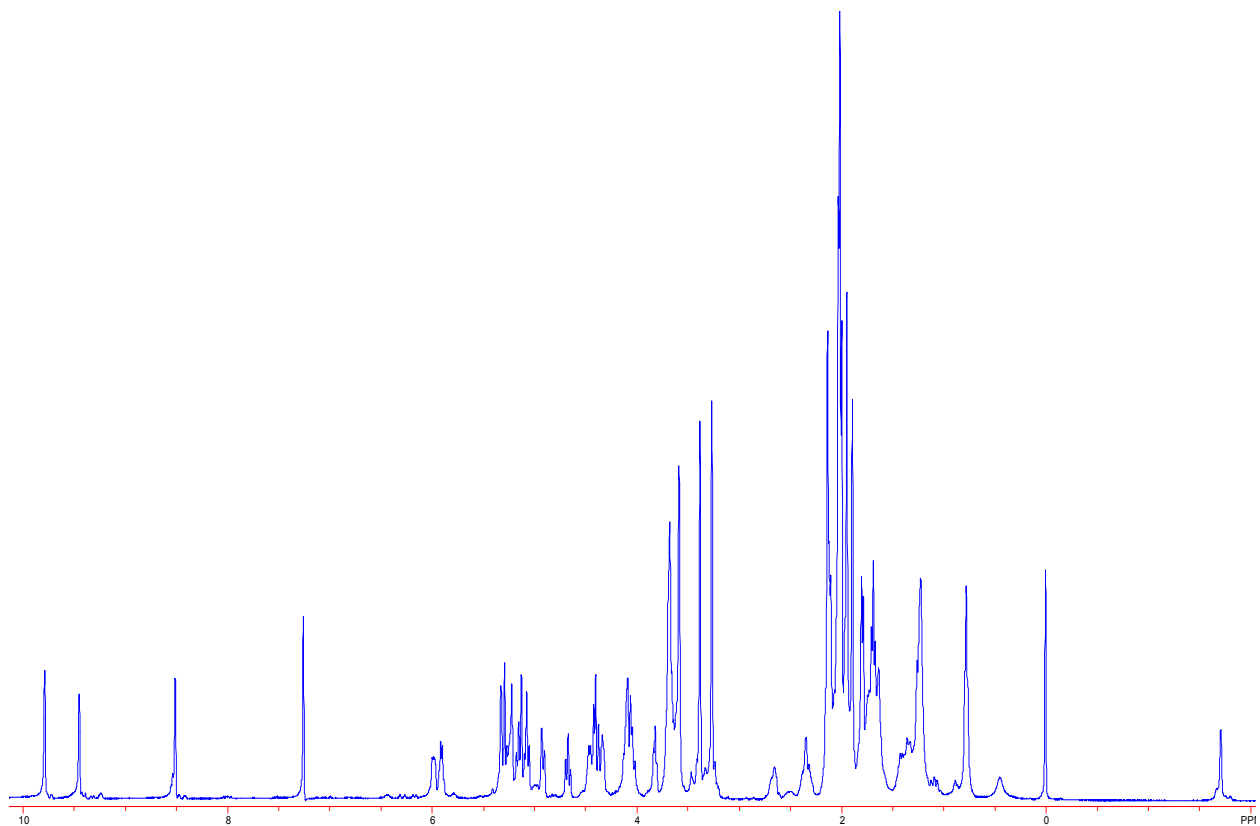

# Compound 8

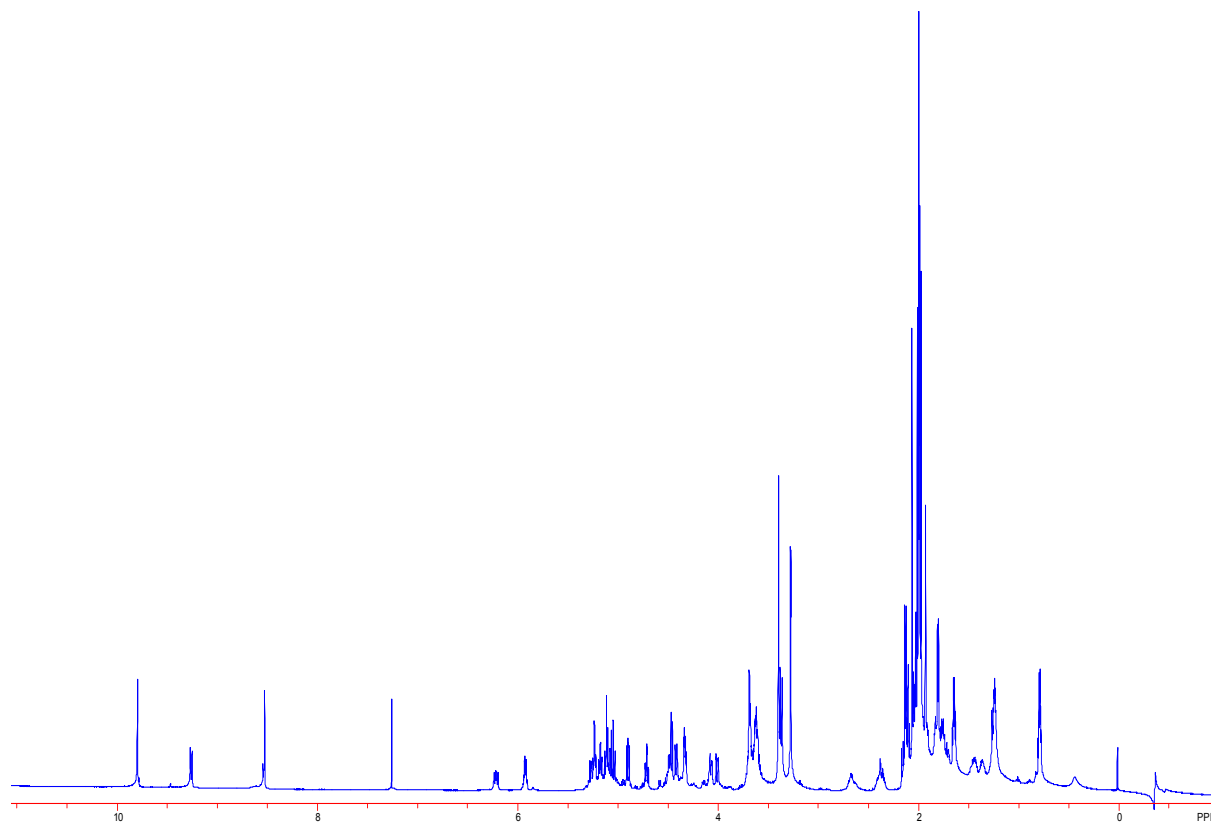

# Compound 9

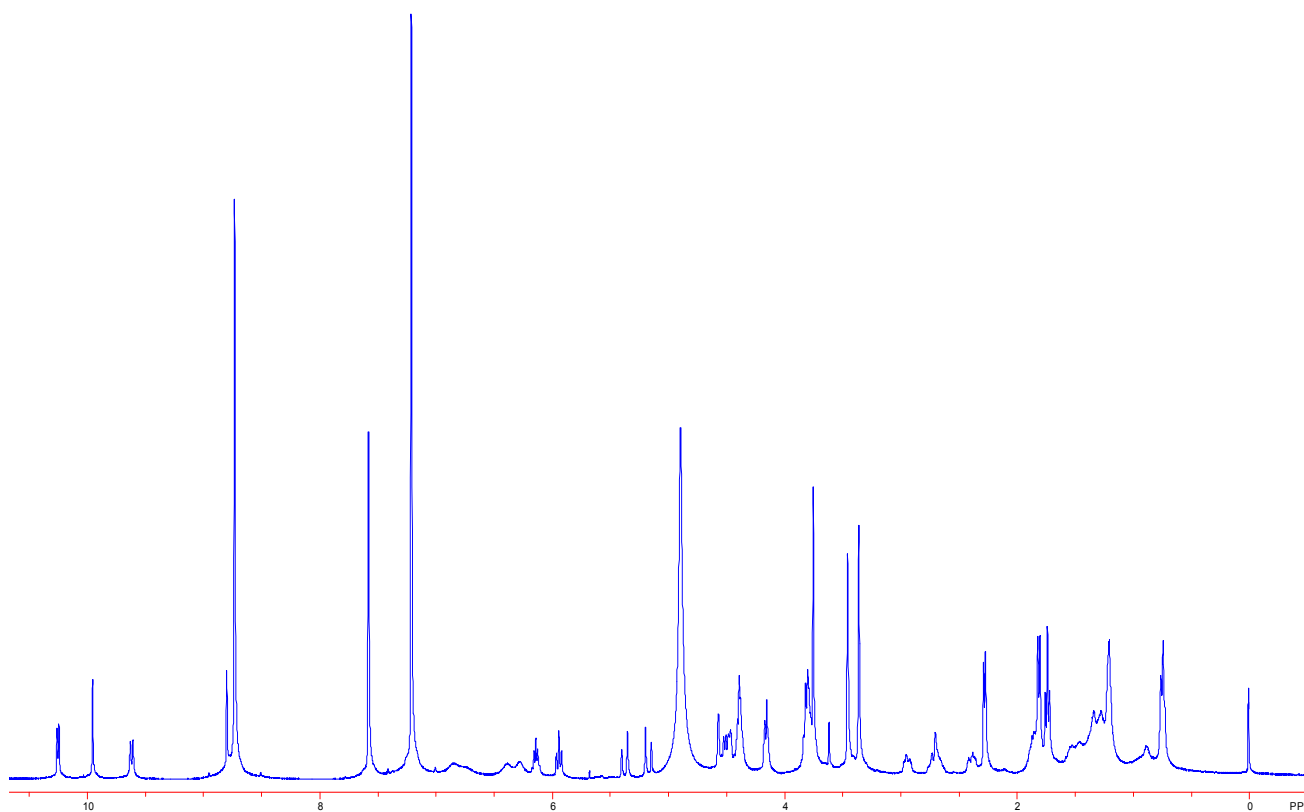

# Compound 10

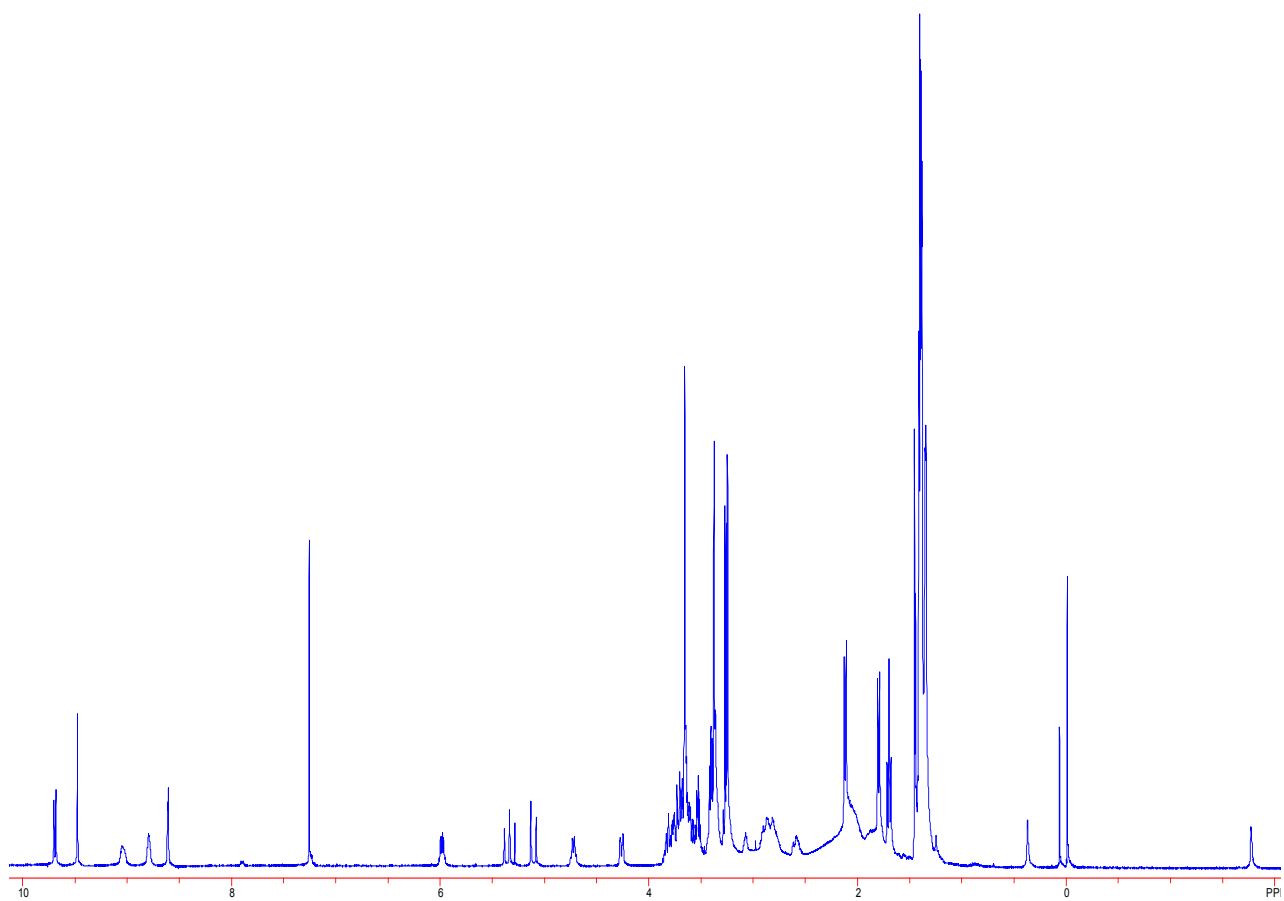

# Compound 11

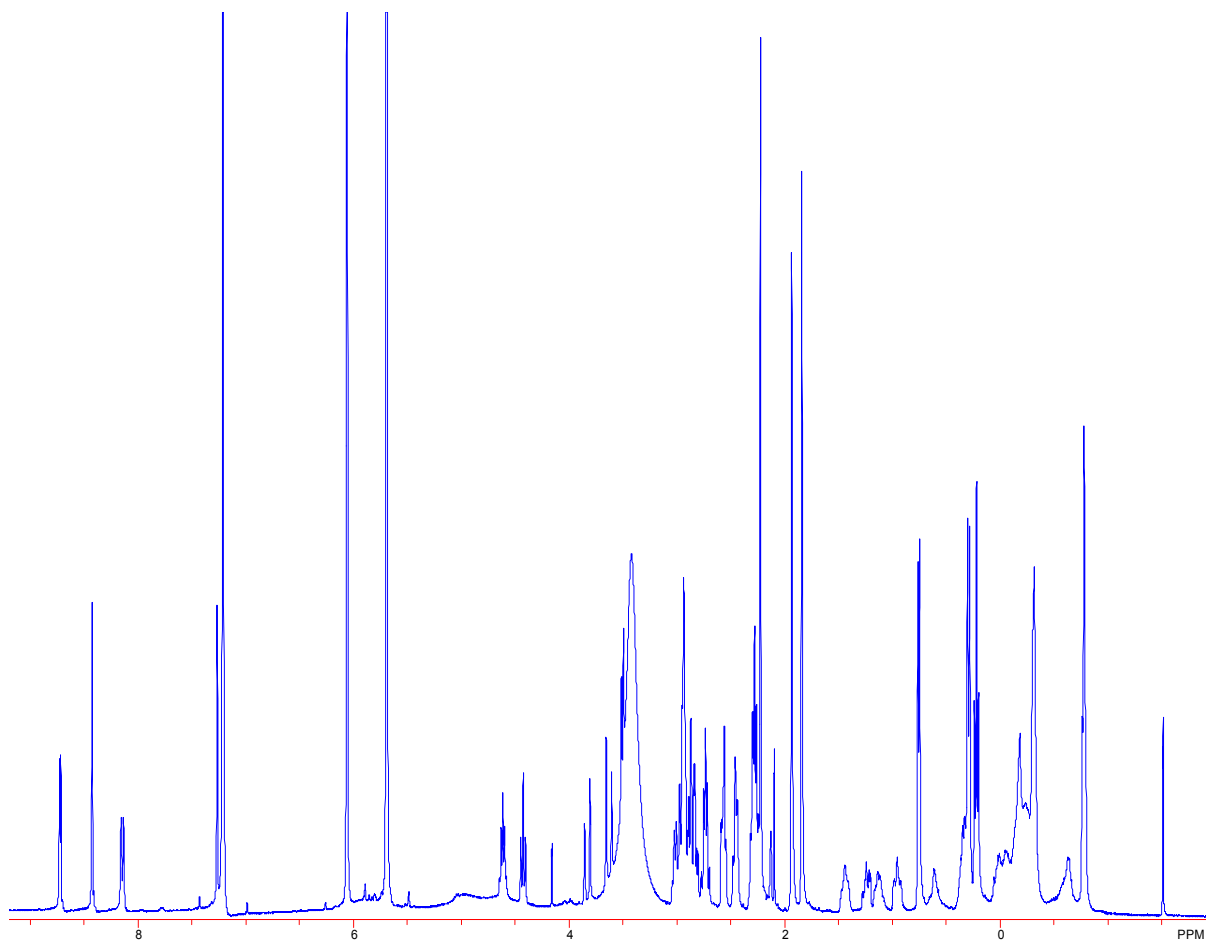

# Compound 12

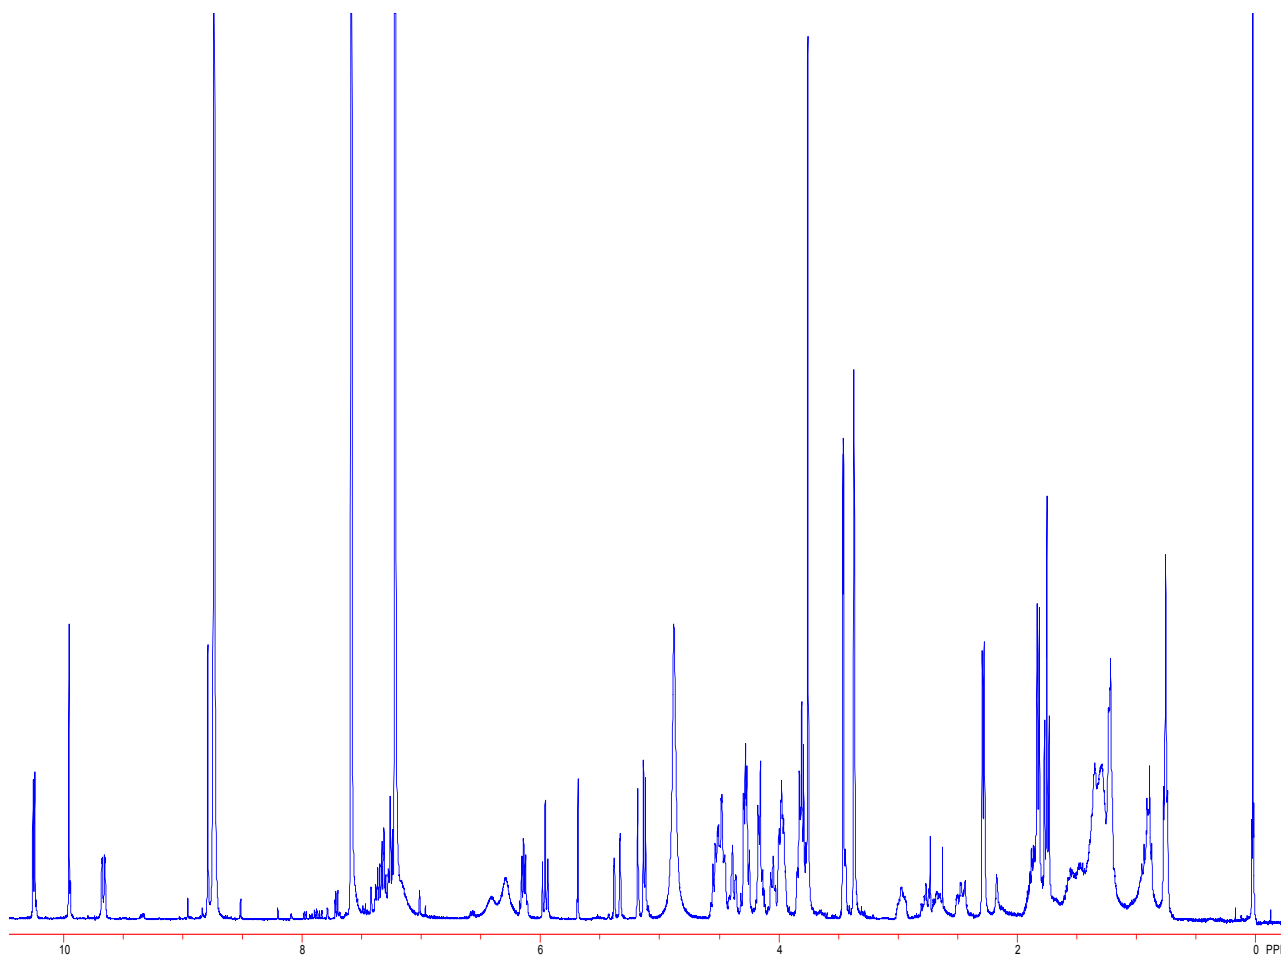

# Compound 13

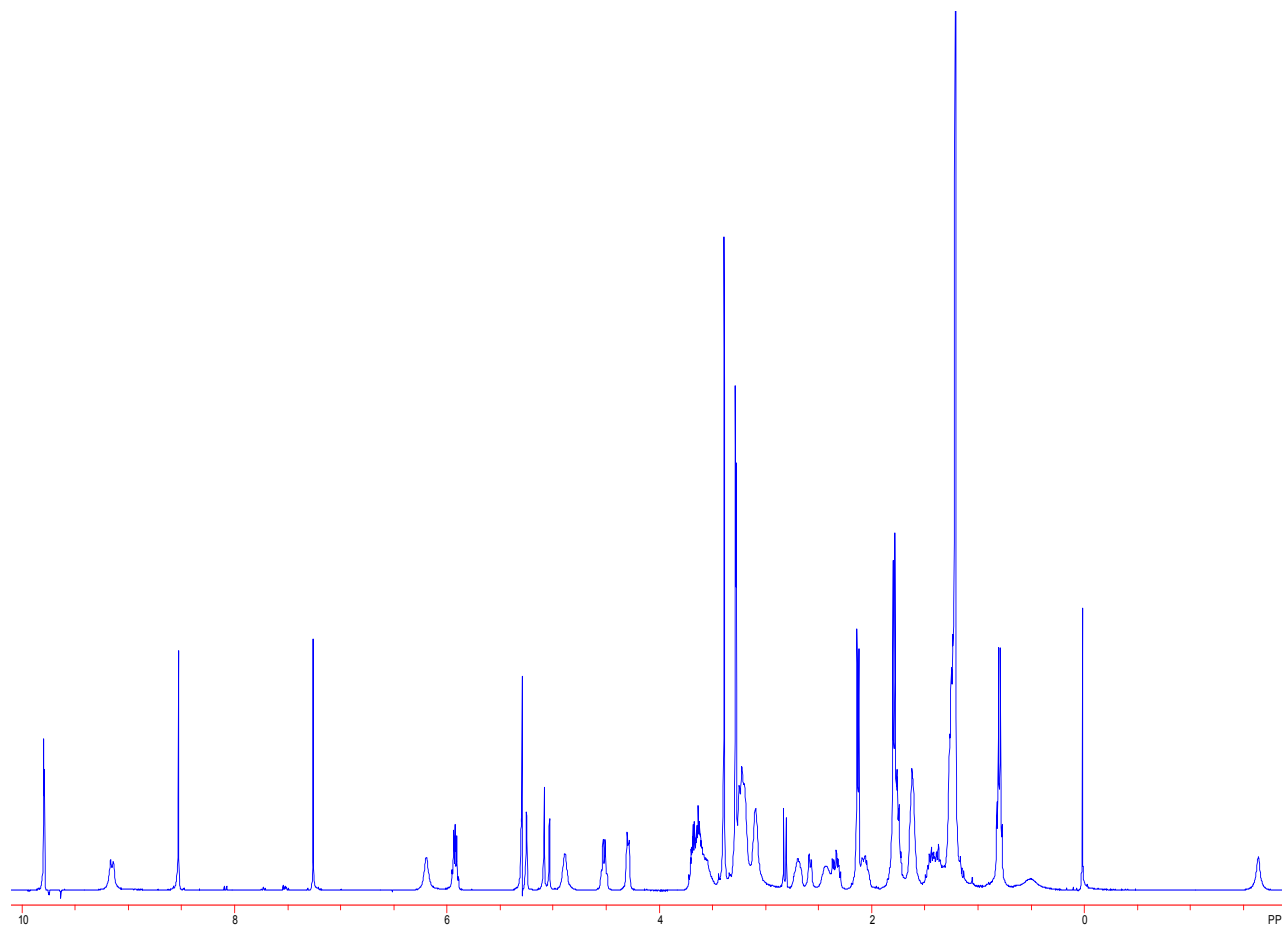



# Compound 19

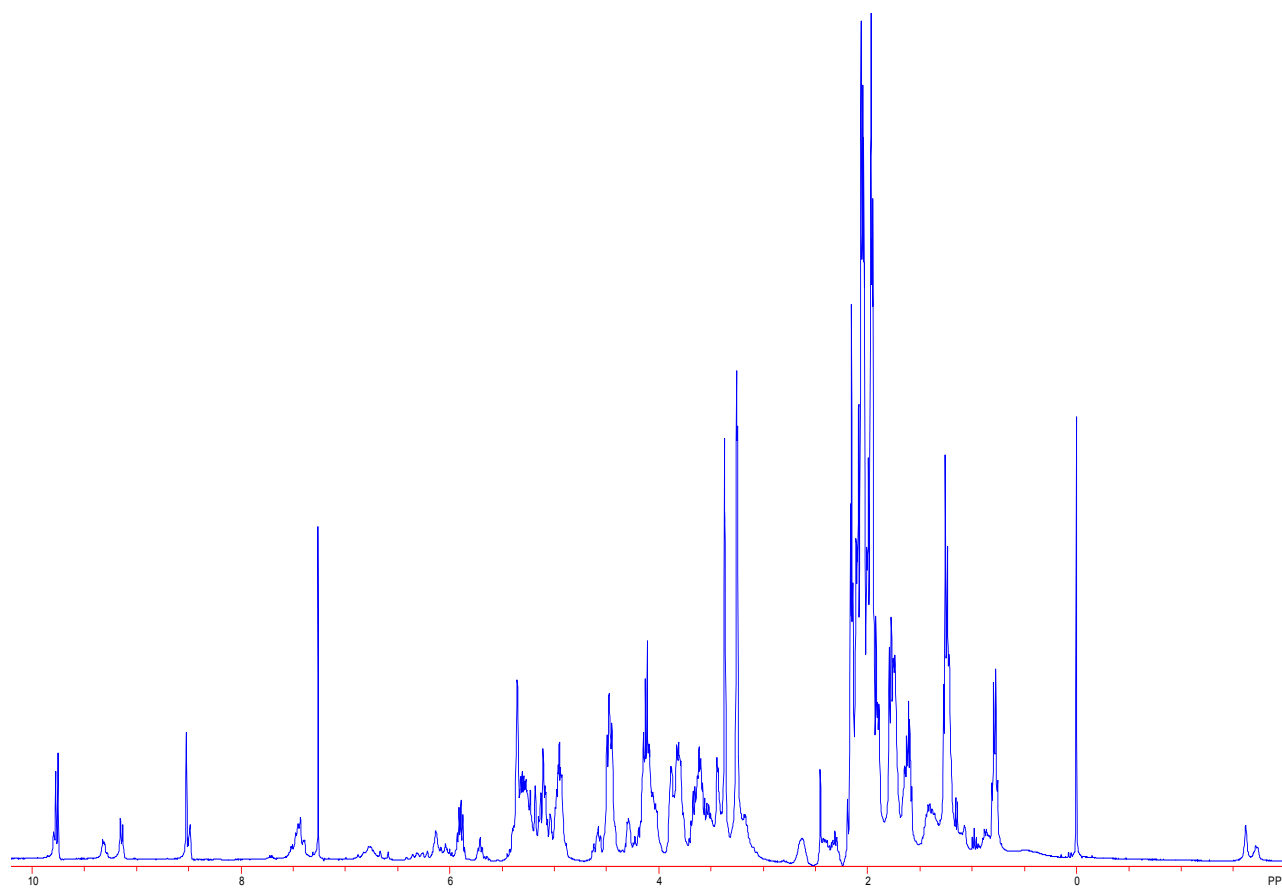

# Compound 20

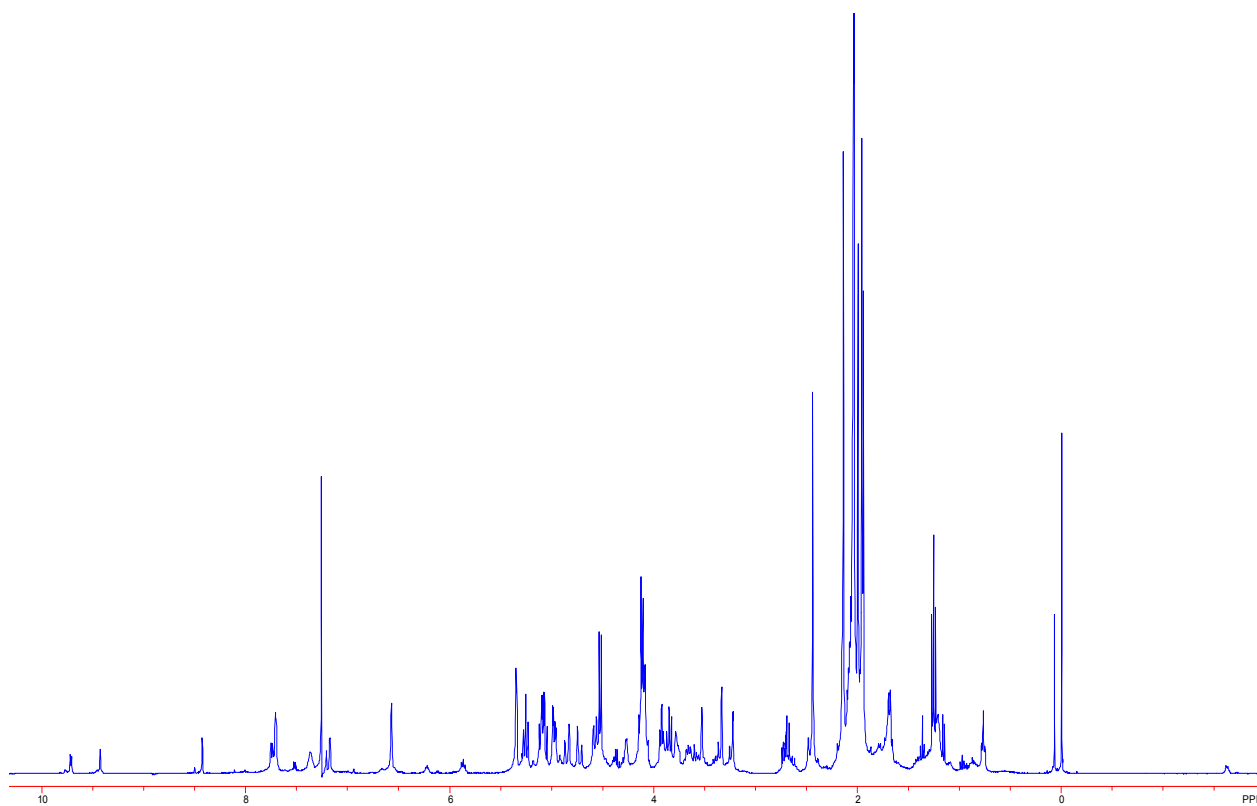

# Compound 21

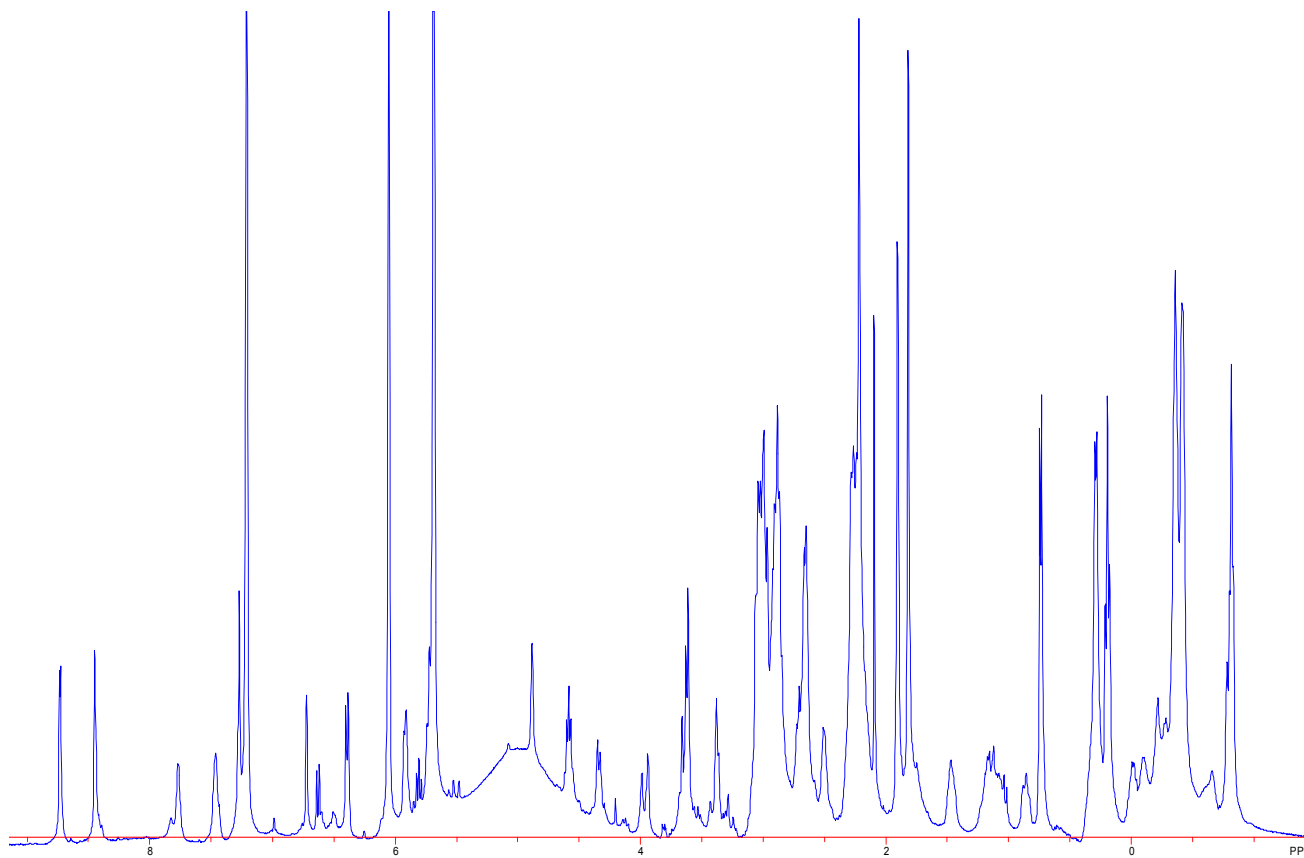

# Compound 22

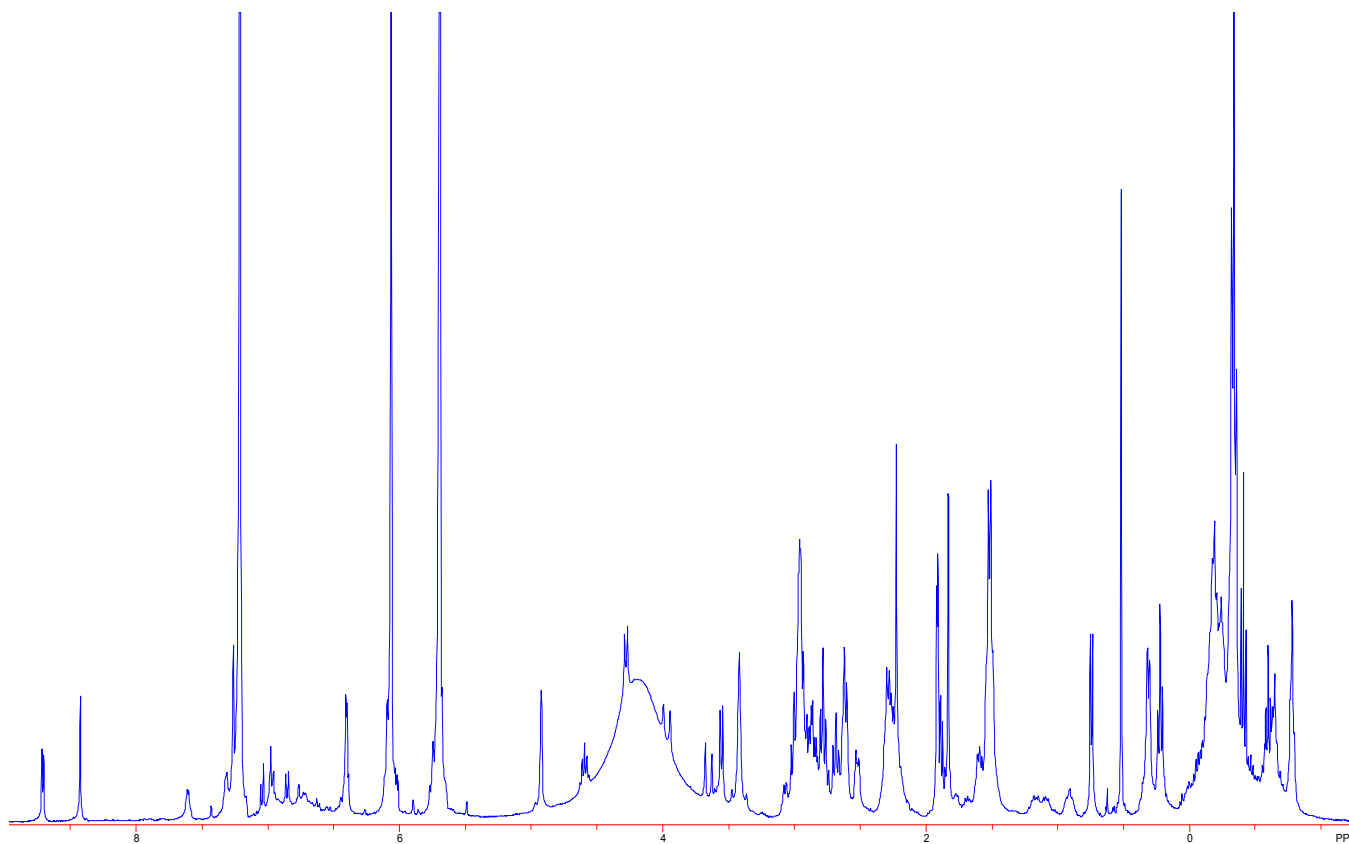

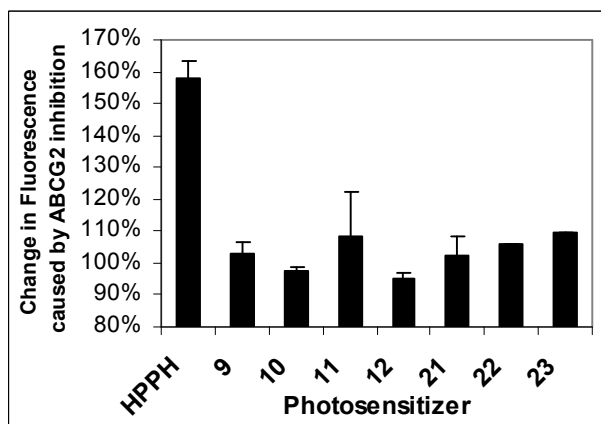

**Figure 1.** Effect of an inhibitor of ABCG2 activity (imatinib mesylate) on retention of HPPH and HPPH-carbohydrate conjugates in RIF cells. Inhibitor 10  $\mu$ M or PBS was added to cells in medium containing 2% FCS at for 30 minutes at 37°C followed by HPPH or the conjugates at 1  $\mu$ M for 1 h at 37°C. Cells were placed on ice and fluorescence measured by flow cytometry. The size of the increase in fluorescence in the presence of inhibitor indicates relative substrate specificity for ABCG2.

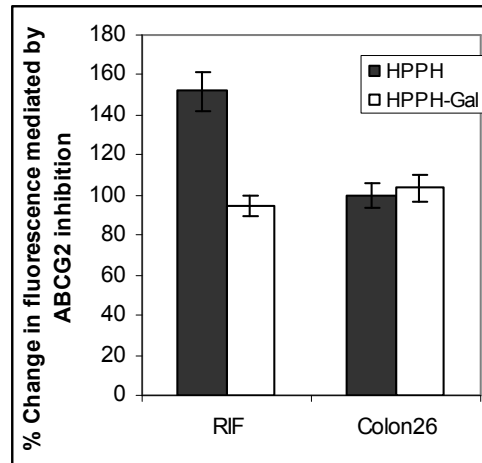

**Figure 2.** Comparative effects of ABCG2 inhibitor (imatinib mesylate) on retention of HPPH or HPPH-Gal in RIF and Colon26 cells. No change observed for either HPPH or HPPH Gal in the ABCG2 negative Colon26 cells.

**Figure 3:** Comparative intracellular localization of HPPH-carbohydrate conjugates with MitoTracker Green (a mitochondrial probe), Bodipy C5 ceramide (a golgi apparatus probe) and Lyso Tracker Green (a lysosomal probe) respectively in RIF cells: **A)** MitoTracker Green; **B)** PS conjugate; **C)** A and B merged; **D)** Bodipy C5 ceramide; **E)** PS conjugate; **F)** D and E merged; **G)** Lyso Tracker; **H)** PS conjugate; **I)** G and H merged

*(i) Figure 3a:*

**9 (HPPH-Galactose) – 24 h incubation**

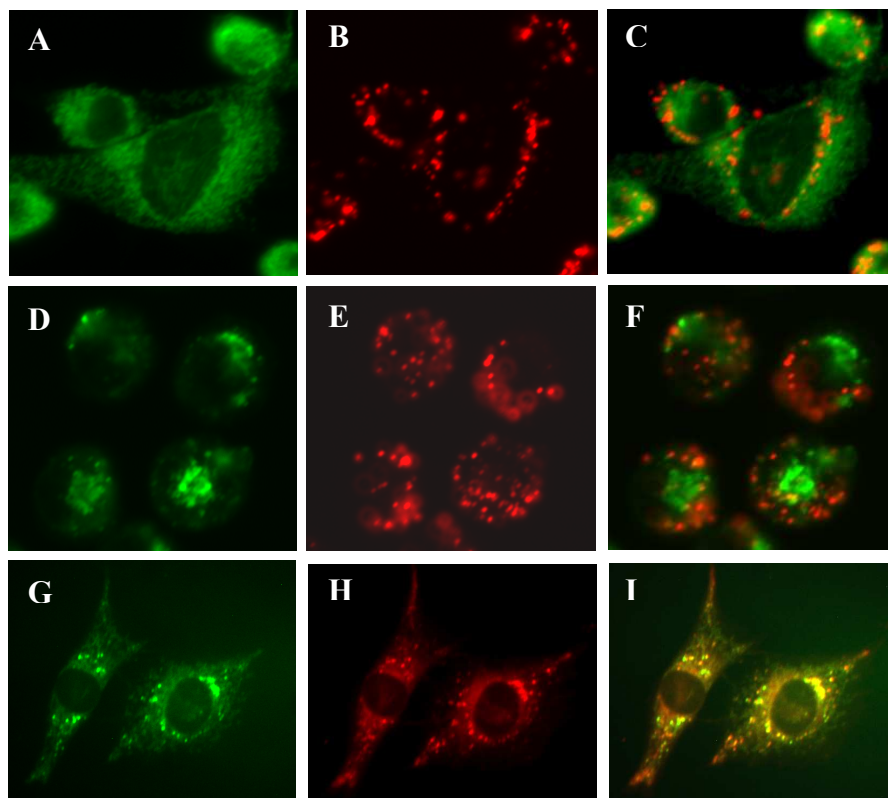

(ii) *Figure 3b:*

10 (HPPH-Glucose) – 24 h incubation

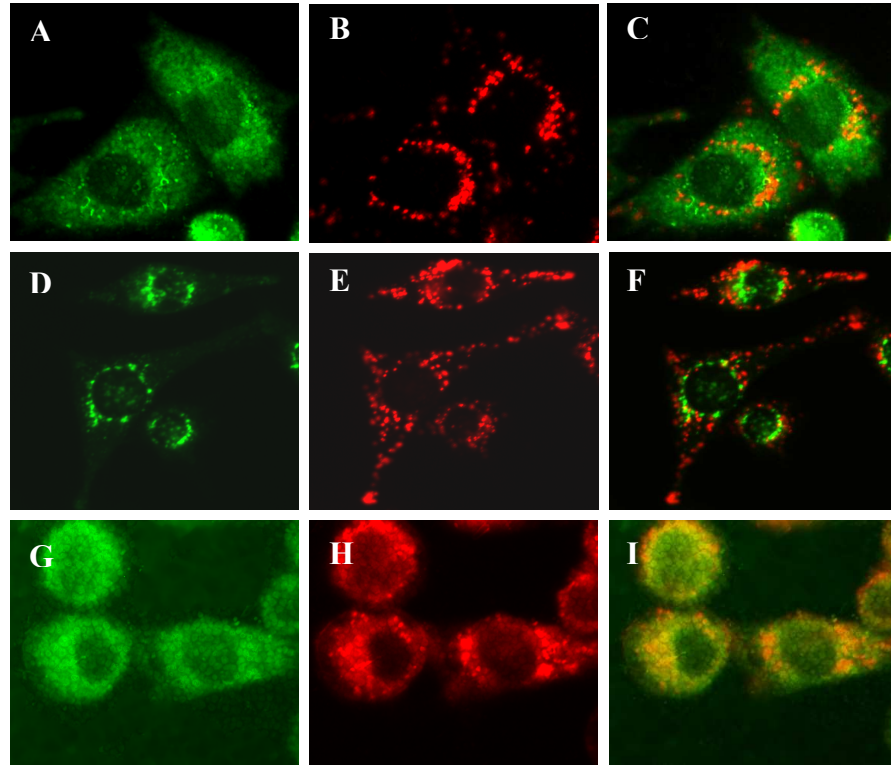



*Figure 3c:*

11 (HPPH-Lactose) – 24 h incubation

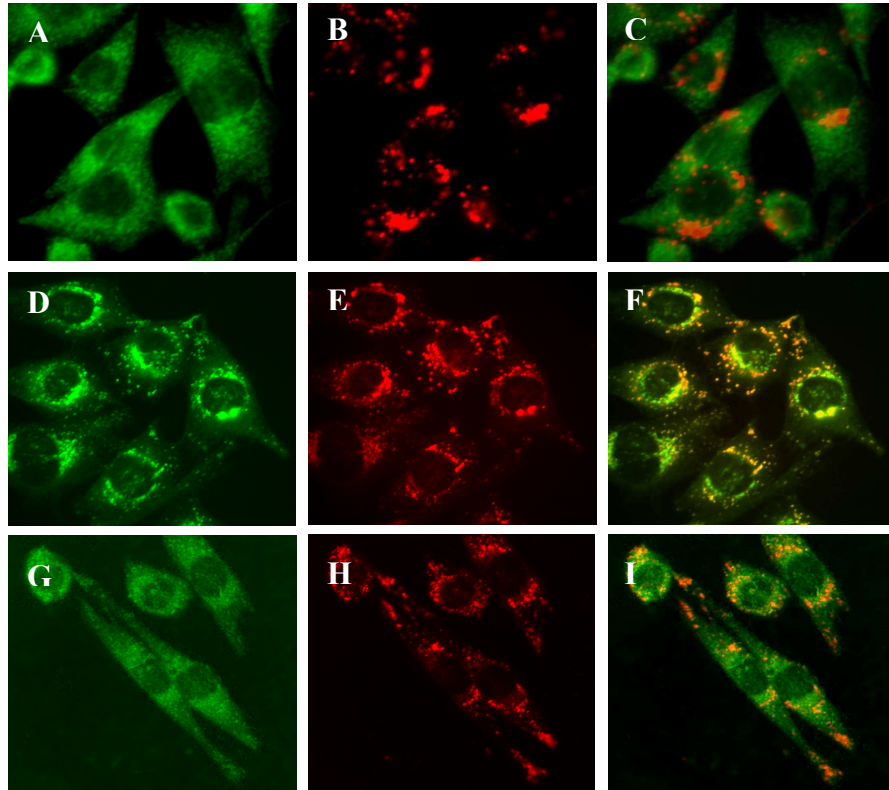

*Figure 3d:*

**12 (HPPH-Cellobiose) – 24 h incubation**

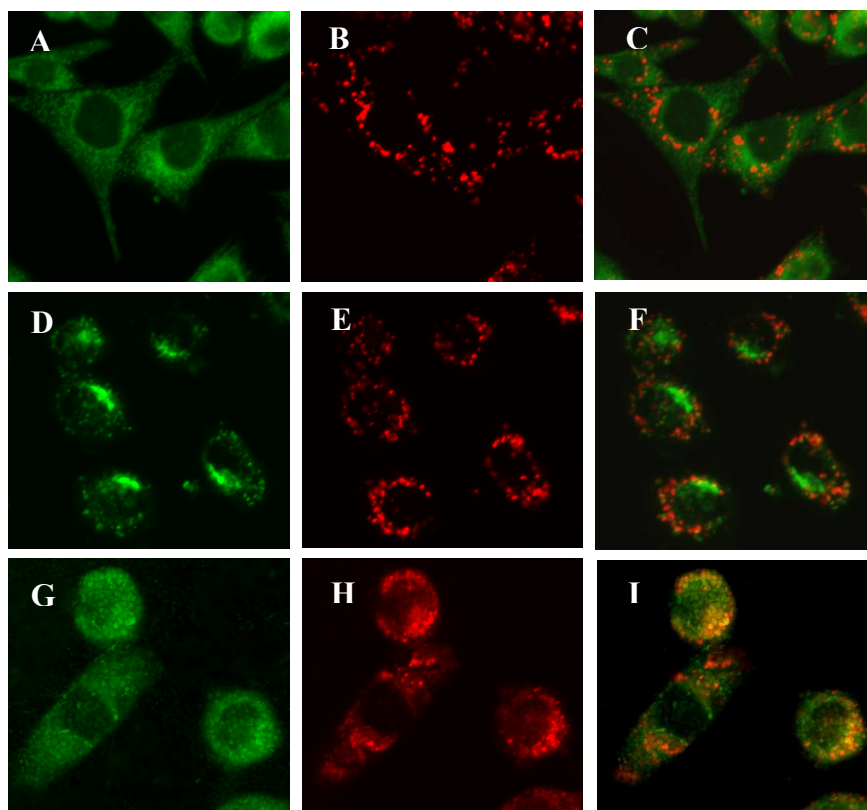

*Figure 3e:*

21 (HPPH-Monolactose) – 24 h incubation

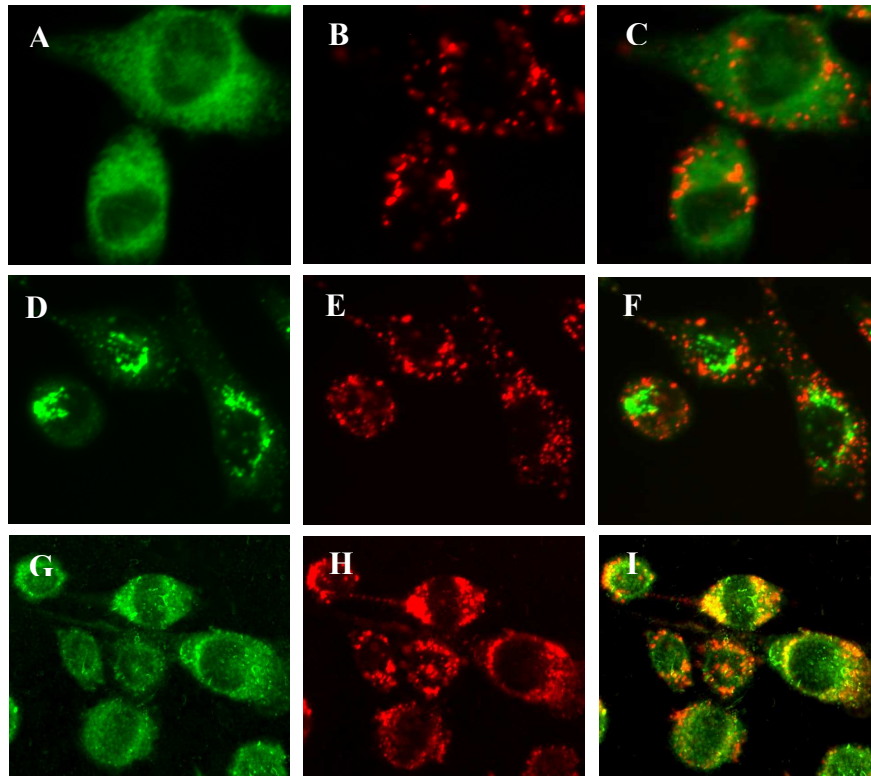

**Figure 3f:**

**22 (HPPH-Dilactose) – 24 h incubation**

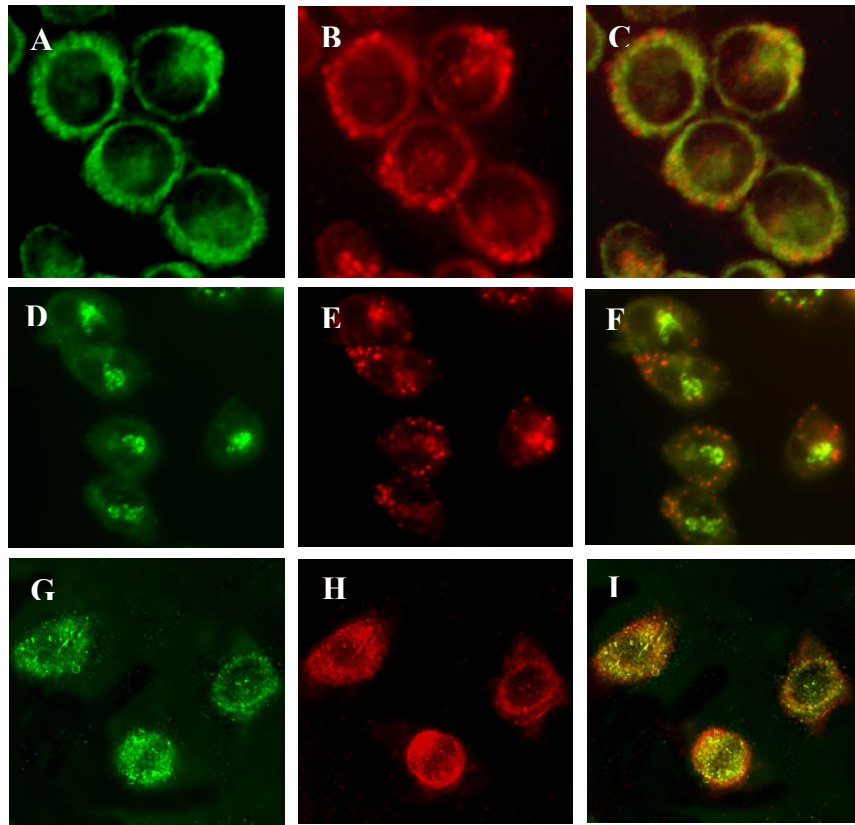

*Figure 3g;*

23 (HPPH-Tetralactose) – 24 h incubation

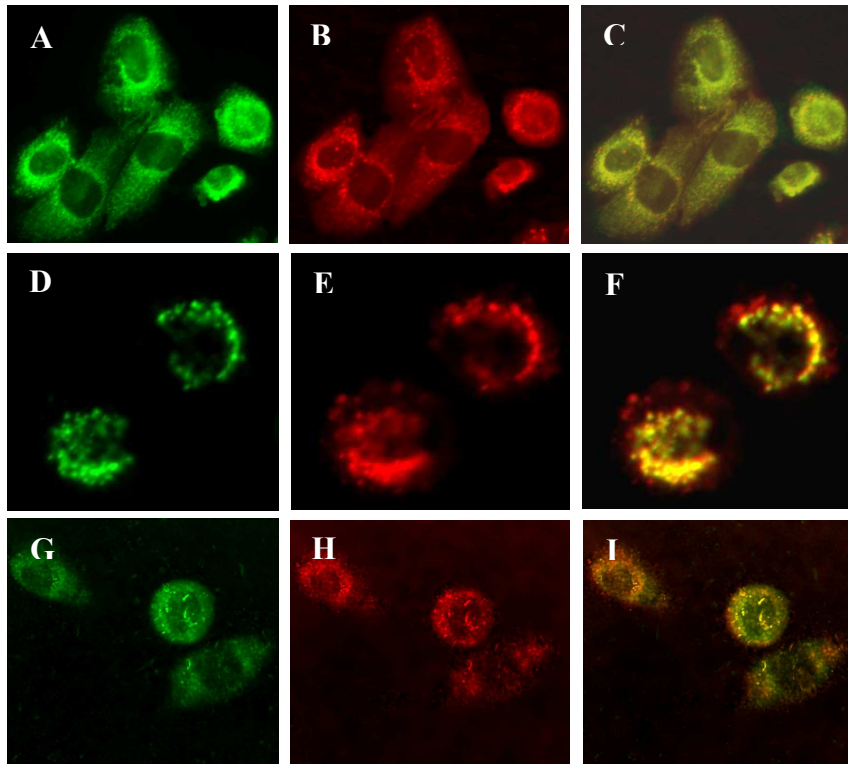

**Table 1** Intracellular localization of **HPPH** and its carbohydrate conjugates

| <b>Compound</b>            | <b>HPPH</b> | <b>9</b>     | <b>9</b>     | <b>10</b>    | <b>11</b>    | <b>12</b>    | <b>21</b>        | <b>22</b>      | <b>23</b>         |
|----------------------------|-------------|--------------|--------------|--------------|--------------|--------------|------------------|----------------|-------------------|
|                            |             | <b>(Gal)</b> | <b>(Gal)</b> | <b>(Glc)</b> | <b>(Lac)</b> | <b>(Cel)</b> | <b>(Monolac)</b> | <b>(Dilac)</b> | <b>(Tetralac)</b> |
| <b>Incubation time (h)</b> | <b>24</b>   | <b>3</b>     | <b>24</b>    | <b>24</b>    | <b>24</b>    | <b>24</b>    | <b>24</b>        | <b>24</b>      | <b>24</b>         |
| <b>Mitochondria</b>        | <b>+</b>    | <b>-</b>     | <b>-</b>     | <b>-</b>     | <b>-</b>     | <b>-</b>     | <b>-</b>         | <b>+</b>       | <b>+</b>          |
| <b>Golgi apparatus</b>     | <b>-</b>    | <b>-</b>     | <b>-</b>     | <b>-</b>     | <b>+</b>     | <b>-</b>     | <b>-</b>         | <b>+</b>       | <b>+</b>          |
| <b>Lysosome</b>            | <b>-</b>    | <b>+</b>     | <b>+</b>     | <b>+</b>     | <b>-</b>     | <b>+</b>     | <b>+</b>         | <b>+</b>       | <b>+</b>          |

**Table 2:** HPLC analysis of the final products\*

| <b>Compound</b>                  | <b>Retention time<br/>(min)</b> | <b>Purity (%)</b> |
|----------------------------------|---------------------------------|-------------------|
| HPPH-Galactose <b>9</b>          | 11.15                           | 97.5              |
| HPPH-Glucose <b>10</b>           | 10.61                           | 97.9              |
| HPPH-Lactose <b>11</b>           | 9.84                            | 97.6              |
| HPPH-Cellobiose <b>12</b>        | 10.26                           | 96.3              |
| HPPH-Regid Monolactose <b>21</b> | 7.75                            | 97                |

\* Under the HPLC conditions (see the experimental section), compounds **22** and **23** retained in the column for a long time. However, as the corresponding acetoxy-analogs these compounds were >95% pure.
